# Supplementary material for: Evaluation of the CCA Immuno-Chromatographic Test to Diagnose Schistosoma mansoni in Minas Gerais State, Brazil
Source: PubMed Central journal article supplement (PMC4709075; doi:10.1371/journal.pntd.0004357), 2016-01-11
Supplement: pntd.0004357.s001.pdf [file pntd.0004357.s001.pdf]

**Supplementary Table 1. Comparative performance of the CCA-ICT**

|                              | "n"                              | Reference test <sup>#</sup>      | CCA trace | Sen (%) | Spec (%)          | PPV (%)           | NPV (%)        | AUC   | Prev % (n) | FP % (n)   | FN % (n)  | kappa | Healthy Control (n) |
|------------------------------|----------------------------------|----------------------------------|-----------|---------|-------------------|-------------------|----------------|-------|------------|------------|-----------|-------|---------------------|
| <b>Silveira et al, 2015</b>  | 130                              | 2KK <sup>#</sup>                 | Neg       | 68.7    | 97.6              | 97.1              | 72.7           | 0.832 | -          | 2.4 (1)    | 31.3 (15) | 0.663 | 41                  |
|                              | 130                              |                                  | Pos       | 85.4    | 78.0              | 82.0              | 82.1           | 0.817 | -          | 22 (9)     | 14.6 (7)  | 0.663 | 41                  |
|                              | 56                               | 2KK/SEA/SWAP-ELISA <sup>1</sup>  | Pos       | 86.8    | 72.2              | -                 | -              | 0.795 | -          | 27.8 (5)   | 13.2 (5)  | -     | -                   |
| Van Dam et al., 2004         | 49                               | 2KK                              | Pos       | 100.0   | 87.0              | 79.6 <sup>2</sup> | 0 <sup>2</sup> | -     | -          | -          | -         | -     | 45                  |
| Stothard et al., 2006        | 590                              | 2KK                              | Pos       | 83.0    | 81.0              | 84.0              | 84.0           | -     | 52         | -          | -         | -     | -                   |
| Legesse et al., 2007         | 251                              | 2KK/MIF <sup>3</sup>             |           | 82.1    | 75.9 <sup>4</sup> | 77.8              | 48.4           | -     | 60.2       | 58.3 (42)  | 17.9 (32) | -     | 58                  |
| Legesse et el., 2008         | 184                              | 2KK/MIF                          |           | 76.9    | 43.4              | 50.0              | 71.9           | -     | 36.4       | 56.6 (60)  | 23.1 (18) | -     | -                   |
| Standley et al., 2010a       | 683                              | 2KK                              | Neg       | 63.5    | 86.4              | 69.1              | 83.2           | -     | 34.6       | 13.6 (56)  | -         | -     | -                   |
|                              |                                  |                                  | Pos       | 78.2    | 66.3              | 52.6              | 86.4           | -     | 34.6       | 37.7 (139) | -         | -     | -                   |
| Standley et al., 2010b       | 171                              | 2KK                              | Neg       | 87.7    | 68.1              | 86.1              | 71.1           | -     | 68.6       | -          | 29 (34)   | -     | -                   |
|                              |                                  |                                  | Pos       | 99.1    | 19.1              | 73.4              | 90.0           | -     | 68.6       | 28.3 (15)  | 5.8 (7)   | -     | -                   |
| Shane et al., 2011           | 482                              | 6KK                              | Neg       | 94.2    | 59.4              | -                 | -              | -     | 38.8       | -          | -         | -     | -                   |
|                              | 413                              | 2KK/2CCA/SWAP-ELISA <sup>5</sup> | Neg       | 96.3    | 74.7              | -                 | -              | -     | -          | -          | -         | -     | -                   |
| Coulibaly et al., 2011       | A Low <sup>6</sup> (146)         | 9KK <sup>9</sup>                 | Neg       | 56.3    | 93.9              | 81.8              | 81.4           | -     | 32.9       | 6.1 (6)    | 43.8 (21) | 0.54  | -                   |
|                              | B moderate <sup>7</sup> (130)    |                                  | Neg       | 69.6    | 91.8              | 90.6              | 72.7           | -     | 53.1       | 8.2 (5)    | 30.4 (21) | 0.60  | -                   |
|                              | C co-endemic <sup>8</sup> (170)  |                                  | Neg       | 89.6    | 84.6              | 98.6              | 40.7           | -     | 91.8       | 15.4 (2)   | 10.4 (16) | 0.49  | -                   |
| Stothard et al., 2011        | 242                              | 4KK/percoll/FLOTAC <sup>10</sup> | Neg       | 59.3    | 95.6              | 81.4              | 87.9           | -     | -          | -          | -         | -     | -                   |
|                              |                                  |                                  | Pos       | 81.4    | 69.9              | 46.6              | 92.1           | -     | -          | -          | -         | -     | -                   |
| Ashton et al., 2011          | 276                              | 2KK                              | Neg       | 65.2    | 95.8              | 83.3              | 89.4           | -     | -          | -          | -         | -     | -                   |
|                              |                                  |                                  | Pos       | 89.1    | 74.2              | 52.9              | 95.5           | -     | -          | -          | -         | -     | -                   |
| Tchuem Tchuente et al., 2012 | A Low <sup>11</sup> (138)        | 9KK <sup>9</sup>                 | Pos       | 82.0    | 64.7              | 56.9              | 86.4           | -     | 36.2       | 35.2 (31)  | 18 (9)    | 0.42  | -                   |
|                              | B moderate <sup>12</sup> (245)   |                                  | Pos       | 82.4    | 62.3              | 84.8              | 58.1           | -     | 71.8       | 37.7 (26)  | 17.6 (31) | 0.43  | -                   |
|                              | C co-endemic <sup>13</sup> (242) |                                  | Pos       | 87.7    | 42.5              | 78.6              | 72.5           | -     | 64         | 42.5 (37)  | 12.3 (19) | 0.47  | -                   |
|                              | All (625)                        |                                  | Pos       | 84.5    | 61.5              | 77.4              | 71.8           | 0.72  | 61         | 38.5 (94)  | 15.5 (59) | 0.47  | -                   |
| Navaratnam et al., 2012      | 569                              | 2KK                              | Neg       | 64.4    | 71.8              | 51.5              | 81.3           | -     | 32.2(183)  | 48.5 (111) | 18.5 (34) | -     | -                   |
|                              |                                  |                                  | Pos       | 81.4    | 53.2              | 44.7              | 86.0           | -     | 32.2(183)  | -          | -         | -     | -                   |

|                               |                              |                                    |     |      |       |      |      |       |      |            |            |      |      |
|-------------------------------|------------------------------|------------------------------------|-----|------|-------|------|------|-------|------|------------|------------|------|------|
| Souza Figueiredo et al., 2013 | Low <sup>14</sup> (333)      | SEA-ELISA                          | Pos | 71.8 | 100   | -    | -    | 0.570 | 7.2  | -          | 21.7       | -    | -    |
|                               | Moderate <sup>15</sup> (337) |                                    | Pos | 66.5 | 100   | -    | -    | 0.631 | 16.9 | -          | 2          | -    | -    |
|                               | High <sup>16</sup> (255)     |                                    | Pos | 62.7 | 100   | -    | -    | 0.635 | 38.8 | -          | 2          | -    | -    |
|                               | All (925)                    |                                    | Pos | 66.9 | 100   | -    | -    | -     | -    | -          | 26.1       | -    | -    |
| Dawson et al., 2013           | < 3 <sup>17</sup> (42)       | 4KK                                | Pos | 69.2 | 62.1  | 45.0 | 81.8 | -     | 31   | -          | -          | -    | -    |
|                               | 3-5 <sup>18</sup> (40)       |                                    | Pos | 95.8 | 50.0  | 74.2 | 88.9 | -     | 60   | -          | -          | -    | -    |
| Coulibaly et al., 2013        | 242                          | 4KK/2CCA (trace neg) <sup>19</sup> | Neg | 69.7 | 100.0 | -    | 77.4 | -     | 23.1 | -          | -          | 0.47 | -    |
|                               |                              |                                    | Pos | 89.1 | 59.3  | -    | 84.9 | -     | -    | -          | -          | -    | 0.23 |
| Erko et al., 2013             | 620                          | 6KK                                | Neg | 93.0 | 64.6  | -    | 89.1 | 0.797 | 53.1 | 35.4 (103) | 7 (23)     | 0.59 | 100  |
|                               |                              | 6KK/3CCA <sup>20</sup>             | Neg | 89.9 | 100   | -    | 78.2 | 0.926 | -    | 0          | 10.1 (46)  | -    | -    |
| Colley et al., 2013           | Cameron (733)                | 2KK/CCA/PCR <sup>21</sup>          | Pos | 87.0 | 74.0  | -    | -    | -     | 38.4 | 47.4 (208) | 9.8 (27)   | -    | -    |
|                               | Côte d'Ivoire (607)          |                                    | Pos | 78.0 | 92.0  | -    | -    | -     | 47.9 | 14.4 (42)  | 14.2 (38)  | -    | -    |
|                               | Ethiopia (620)               |                                    | Pos | 92.0 | 94.0  | -    | -    | -     | 43.0 | 44.8 (158) | 6 (16)     | -    | -    |
|                               | Kenya (1,845)                |                                    | Pos | 86.0 | 70.0  | -    | -    | -     | 15.1 | 44.4 (664) | 13.2 (35)  | -    | -    |
|                               | Uganda (500)                 |                                    | Pos | 89.0 | 56.0  | -    | -    | -     | 25   | 53.1 (199) | 8.8 (11)   | -    | -    |
|                               | All countries (4,305)        |                                    | Pos | 86.0 | 72.0  | -    | -    | -     | 28.9 | 43 (1,271) | 10.6 (127) | -    | -    |
| Adriko et al., 2014           | A Low (100)                  | 2KK                                | Pos | 75   | 54    | 13   | 96   | -     | 8    | -          | -          | 0.1  | -    |
|                               |                              | 6KK                                |     | 75   | 55    | 19   | 94   | -     | 13   | -          | -          | 0.1  | -    |
|                               | B moderate (200)             | 2KK                                | Pos | 87   | 47    | 32   | 92   | -     | 23   | -          | -          | 0.2  | -    |
|                               |                              | 6KK                                |     | 84   | 52    | 46   | 87   | -     | 33   | -          | -          | 0.3  | -    |
|                               | C moderate (200)             | 2KK                                | Pos | 96   | 41    | 48   | 95   | -     | 36   | -          | -          | 0.3  | -    |
|                               |                              | 6KK                                |     | 92   | 50    | 69   | 84   | -     | 55   | -          | -          | 0.4  | -    |
|                               | All (500)                    | 2KK                                | Pos | 91   | 47    | 36   | 94.1 | -     | 25   | -          | -          | 0.3  | -    |
|                               | All (469)                    | 6KK                                |     | 88   | 52    | 53   | 88   | 0.70  | 38   | -          | 12 (21)    | 0.4  | -    |

CCA-ICT: Circulating Cathodic Antigen-Immuno-Chromatographic; "n": number of individuals; #Reference test to calculate the performance to CCA; Sen: sensitivity; Spec: Specificity; PPV: Positive Predictive Value; NPV: Negative Predictive Value; AUC: Area under the curve; Prev: Prevalence calculated by fecal microcopy (Kato-Katz); FP: Number of false positives; FN: Number of false negatives; #2KK= Kato-Katz test (2 slides per stool sample); <sup>1</sup>Combined results of 2KK + ELISA (enzyme-linked immunosorbent assay); SEA: soluble egg antigen; SWAP: soluble (adult) worm antigen preparation; <sup>2</sup>Value from Legesse et al., 2007; <sup>3</sup>Combined results of 2KK and formol-ether concentration (MIF) ; <sup>4</sup>Specificity determined using the control subjects; <sup>5</sup> Combined results of 2KK+2CCA+SWAP-ELISA by LCA (Latent class analysis); <sup>6</sup>Low endemicity (10-24% prevalence); <sup>7</sup>Moderate transmission (25-49% prevalence); <sup>8</sup>co-endemic for *S. mansoni* and *S. haematobium*; <sup>9</sup>KK: Kato-Katz test (3 slides per stool sample); <sup>10</sup>Combined results of 4KK (2 slides per stool sample) and percoll and FLOTAC; <sup>11</sup>Setting A: low endemicity of single *S. mansoni* transmission; <sup>12</sup>Setting B: moderate endemicity of single *S. mansoni* transmission; <sup>13</sup>Setting C: Mixed infections of *S. mansoni* and *S. haematobium*; <sup>14</sup>Low transmission (< 10% prevalence); <sup>15</sup>Moderate transmission (10-25% prevalence); <sup>16</sup>High transmission (>25% prevalence); <sup>17</sup>Children aged under 3 years; <sup>18</sup>Children between 3-5 years; <sup>19</sup>Combined results of 4KK+2CCA (considering trace results as negative); <sup>20</sup>Combined results of 6 Kato-Katz (2 slides per stool sample) and triple urine CCA cassette; <sup>21</sup>Combined results of Kato-Katz test (2 slides per stool sample), one CCA test and *Schistosoma*-specific PCR (polymerase chain reaction) by LCA (Latent class analysis);

## References for Supplementary Table 1

- van Dam GJ, Wichers JH, Ferreira TM, Ghatai D, van Amerongen A, Deelder AM: Diagnosis of schistosomiasis by reagent strip test for detection of circulating cathodic antigen. *J Clin Microbiol* 2004, 42(12):5458-61.
- Stothard JR, Kabatereine NB, Tukahebwa EM et al: Use of circulating cathodic antigen (CCA) dipsticks for detection of intestinal and urinary schistosomiasis. *Acta Trop* 2006, 97:219–28.
- Legesse M, Erko B. Field-based evaluation of a reagent strip test for diagnosis of *Schistosoma mansoni* by detecting circulating cathodic antigen in urine before and after chemotherapy. *Trans R Soc Trop Med Hyg.* 2007, 101(7):668-73.
- Legesse M & Erko B. Field-based evaluation of a reagent strip test for diagnosis of schistosomiasis mansoni by detecting circulating cathodic antigen (CCA) in urine in low endemic area in Ethiopia. *Parasite.* 2008. 15. 151-155
- Standley CJ, Adriko M, Arinaitwe M, Atuhaire A, Kazibwe F, Fenwick A, Kabatereine NB, Stothard JR: Epidemiology and control of intestinal schistosomiasis on the Sesse Islands, Uganda: integrating malacology and parasitology to tailor local treatment recommendations *Parasites & Vectors* 2010a, 3:64.
- Standley CJ, Lwambo NJS, Lange CN, Kariuki HC, Adriko M, Stothard JR. Performance of circulating cathodic antigen (CCA) urine-dipsticks for rapid detection of intestinal schistosomiasis in schoolchildren from shoreline communities of Lake Victoria. *Parasites & Vectors* 2010b. 3:7
- Shane HL, Verani JR, Abudho B, Montgomery SP, Blackstock AJ, et al: Evaluation of Urine CCA Assays for Detection of *Schistosoma mansoni* Infection in Western Kenya. *PLoS Negl Trop Dis* 2011, 5(1): e951. doi:10.1371/journal.pntd.0000951
- Coulibaly JT, Knopp S, N'Guessan NA, Silue KD, Furst T, et al.: Accuracy of urine circulating cathodic antigen (CCA) test for *Schistosoma mansoni* diagnosis in different settings of Cote d'Ivoire. *PLoS Negl Trop Dis* 2011, 5: e1384
- Stothard JR, Sousa-Figueroa JC, Betson M, Adriko M, Arinaitwe M, Rowell C, Besiyege F, Kabatereine NB: *Schistosoma mansoni* Infections in Young Children: When Are Schistosome Antigens in Urine, Eggs in Stool and Antibodies to Eggs First Detectable? *PLoS Negl Trop Dis* 2011, 5(1): e938. doi:10.1371/journal.pntd.0000938
- Ashton RA, Stewart BT, Petty N, Lado M, Finn T, Brooker S, Kolaczinski JH Trop: Accuracy of circulating cathodic antigen tests for rapid mapping of *Schistosoma mansoni* and *S. haematobium* infections in Southern Sudan *Med Int Health* 2011,16(9):1099-103. doi: 10.1111/j.1365-3156.2011.02815.x.
- Coulibaly JT, Goran EKN, Utzinger J, Doenhoff MJ and Dawson EM. A new rapid diagnostic test for detection of anti-*Schistosoma mansoni* and anti-*Schistosoma haematobium* antibodies. *Parasites & Vectors* 2013, 6:29.
- Tchuem Tchente LA: Control of soil-transmitted helminths in sub-Saharan Africa: diagnosis, drug efficacy concerns and challenges. *Acta Trop* 2011, 120 Suppl 1:S4-11.
- Navaratnam AM, Mutumba-Nakalembe MJ, Stothard JR, Kabatereine NB, Fenwick A, Sousa-Figueiredo JC: Notes on the use of urine-CCA dipsticks for detection of intestinal schistosomiasis in preschool children. *Trans R Soc Trop Med Hyg.* 2012 106(10):619-22. doi: 10.1016/j.trstmh.2012.06.010.

- Dawson EM., Sousa-Figueiredo JC., Kabatereine NB., Doenhoff MJ. and J. Stothard R.: Intestinal schistosomiasis in pre school-aged children of Lake Albert, Uganda: diagnostic accuracy of a rapid test for detection of anti-schistosome antibodies. *Trans R Soc Trop Med Hyg* 2013,107: 639–647.
- Sousa-Figueiredo JC, Betson M, Kabatereine NB, Stothard JR: The Urine Circulating Cathodic Antigen (CCA) Dipstick: A Valid Substitute for Microscopy for Mapping and Point-Of-Care Diagnosis of Intestinal Schistosomiasis. *PLoS Negl Trop Dis* 2013, 7(1): e2008. doi:10.1371/journal.pntd.0002008
- Coulibaly JT, Goran EKN, Utzinger J, Doenhoff MJ and Dawson EM. A new rapid diagnostic test for detection of anti-Schistosoma mansoni and anti-Schistosoma haematobium antibodies. *Parasites & Vectors* 2013, 6:29.
- Erko B, Medhin G, Teklehaymanot T, Degarege A, Legesse M: Evaluation of urine-circulating cathodic antigen (Urine-CCA) cassette test for the detection of Schistosoma mansoni infection in areas of moderate prevalence in Ethiopia. *Trop Med Int Health* 2013,18: 1029–1035
- Colley DG, Binder S, Campbell C, King CH, Tchuem Tchuente LA, N'Goran EK, Erko B, Karanja DM, Kabatereine NB, van Lieshout L et al: A five-country evaluation of a point-of-care circulating cathodic antigen urine assay for the prevalence of Schistosoma mansoni. *Am J Trop Med Hyg* 2013, 88(3):426-432.
- Adriko M, Standley CJ, Tinkitina B, Tukahebwa EM, Fenwick A, Fleming FM, Sousa-Figueiredo JC, Stothard JR, Kabatereine NB: Evaluation of circulating cathodic antigen (CCA) urine-cassette assay as a survey tool for Schistosoma mansoni in different transmission settings within Bugiri District, Uganda. *Acta Trop* 2014, 136:50-7. doi: 10.1016/j.actatropica.
